# Supplementary material for: Multitarget Action of Xanthones from Garcinia mangostana against α-Amylase, α-Glucosidase and Pancreatic Lipase
Source: MDPI journal article supplement (doi:10.3390/molecules27103283), 2022-05-20
Supplement: s1 [file s1]

## Supplementary materials

### Multitarget action of xanthones from *Garcinia mangostana* against $\alpha$ -amylase, $\alpha$ -glucosidase and pancreatic lipase

Juan Cardozo-Muñoz<sup>1</sup>, Luis E. Cuca-Suárez<sup>1</sup>, Juliet A. Prieto-Rodríguez<sup>2</sup>, Fabian Lopez-Vallejo<sup>1</sup>, Oscar J. Patiño-Ladino<sup>1,\*</sup>

<sup>1</sup>Departamento de Química, Facultad de Ciencias, Universidad Nacional de Colombia, Sede Bogotá, Bogotá, 111321, Colombia; jcardozom@unal.edu.co (J.C.M.); lecucas@unal.edu.co (L.E.C.S.); fhlopezv@unal.edu.co (F.H.L.V.)

<sup>2</sup>Departamento de Química, Facultad de Ciencias, Pontificia Universidad Javeriana, Bogotá 110231, Colombia; juliet.prieto@javeriana.edu.co (J.A.P.R.)

\*Correspondence: ojpatinol@unal.edu.co; Tel: +57-1-3165000 (ext. 14485)

### Table of contents:

#### 1. Isolation Compound

**Scheme S1.** Isolation scheme of compounds **1** to **5** from *G. mangostana*.

#### 2. NMR spectra from phytochemistry isolation and synthetics compounds.

**Figures S1.** <sup>1</sup>H-NMR spectra of 9-hydroxycalabaxanthone (**1**).

**Figures S2.** APT spectra of 9-hydroxycalabaxanthone (**1**).

**Figures S3.** <sup>1</sup>H-NMR spectra of 8-deoxygartanin (**2**).

**Figures S4.** APT spectra of 8-deoxygartanin (**2**).

**Figures S5.** <sup>1</sup>H-NMR spectra of gartanin (**3**).

**Figures S6.** APT spectra of gartanin (**3**).

**Figures S7.** <sup>1</sup>H-NMR spectra of  $\alpha$ -mangostin (**4**).

**Figures S8.** APT spectra of  $\alpha$ -mangostin (**4**).

**Figures S9.** <sup>1</sup>H-NMR spectra of  $\gamma$ -mangostin (**5**).

**Figures S10.** APT spectra of  $\gamma$ -mangostin (**5**).

**Figures S11.** <sup>1</sup>H-NMR spectra of fuscaxanthone C (**6**).

**Figures S12.** APT spectra of fuscaxanthone C (**6**).

**Figures S13.** <sup>1</sup>H-NMR spectra of 3-isomangostin (**7**).

**Figures S14.** APT spectra of 3-isomangostin (**7**).

**Figures S15.** <sup>1</sup>H-NMR spectra of BR-xanthone-A (**8**).

**Figures S16.** APT spectra of BR-xanthone-A (**8**).

**Figures S17.** <sup>1</sup>H-NMR spectra of tetrahydro- $\alpha$ -mangostin (**9**).

**Figures S18.** APT spectra of tetrahydro- $\alpha$ -mangostin (**9**).

**Figures S19.** <sup>1</sup>H-NMR spectra of 3,6-di-pentoxy- $\alpha$ -mangostin (**10**).

**Figures S20.** APT spectra of 3,6-di-pentoxy- $\alpha$ -mangostin (**10**).

**Figures S21.** <sup>1</sup>H-NMR spectra of 3,6-di-methoxy-4-methyl- $\alpha$ -mangostin (**11**).

**Figures S22.** APT spectra of 3,6-di-methoxy-4-methyl- $\alpha$ -mangostin (**11**).

### 3. Molecular docking studies.

**Table S1.** Docking Scoring energies found for compounds **1** to **11** against each enzyme (PL, AA and AG).

**Figure S23.** Molecular docking interaction found for compounds **1** to **11** against PL enzyme.

**Figure S24.** Molecular docking interaction found for compounds **1** to **11** against AA enzyme.

**Figure S25.** Molecular docking interaction found for compounds **1** to **11** against AG enzyme.

### 4. Kinetic study.

**Figure S26.** Kinetic found for compounds **1** to **11** against PL enzyme.

**Figure S27.** Kinetic found for compounds **2** to **9** against AA enzyme.

**Figure S28.** Kinetic found for compounds **1** to **9** against AG enzyme.

## 1. Isolation Compound.

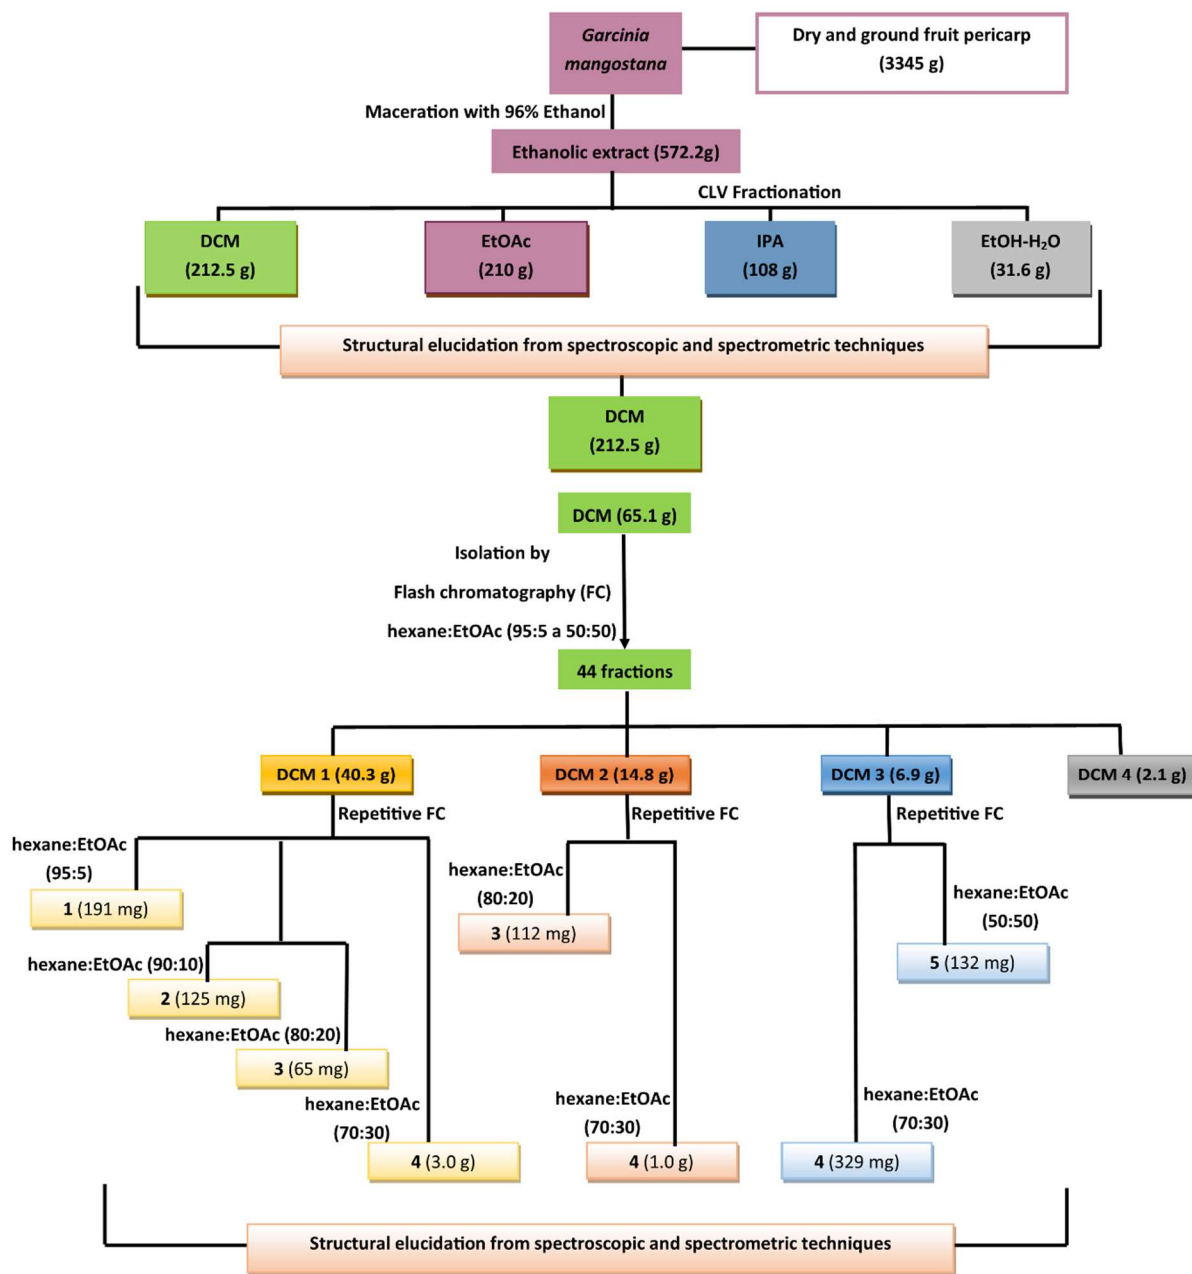

Scheme S1. Isolation scheme of compounds 1 to 5 from *G. mangostana*.

## 2. NMR spectra from phytochemistry isolation and synthetics compounds.

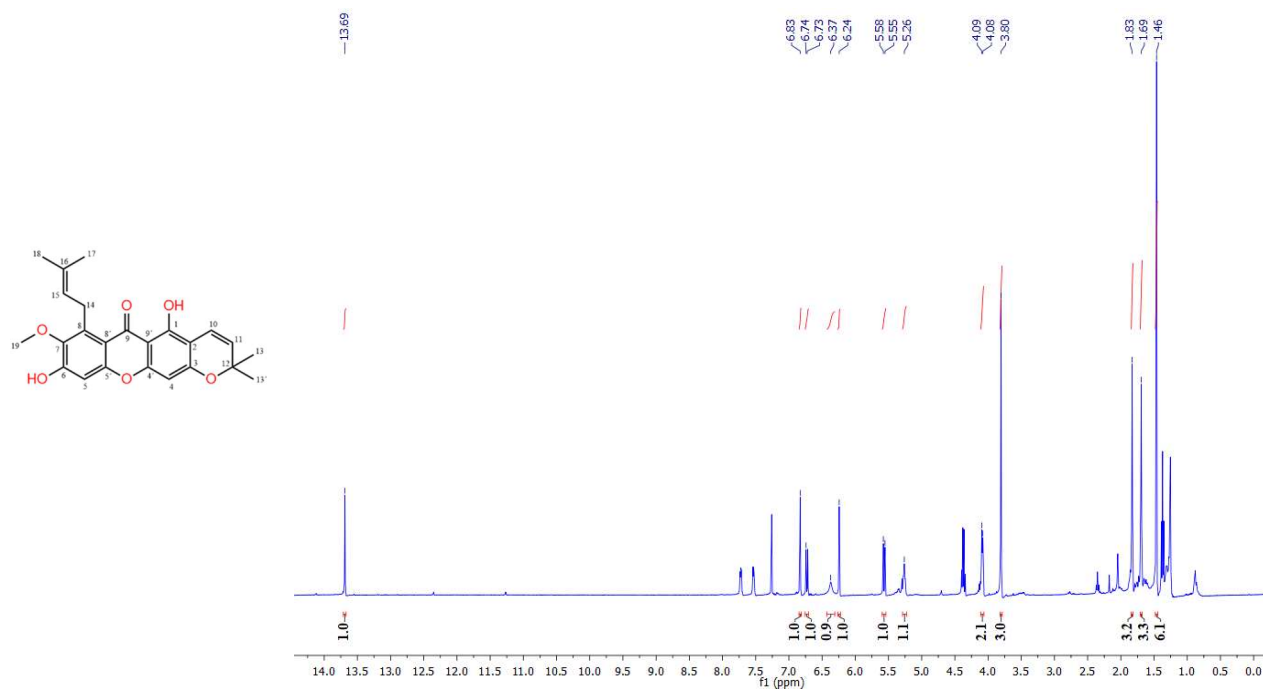

Figures S1.  $^1\text{H}$ -NMR spectra of 9-hydroxycalabaxanthone (1).

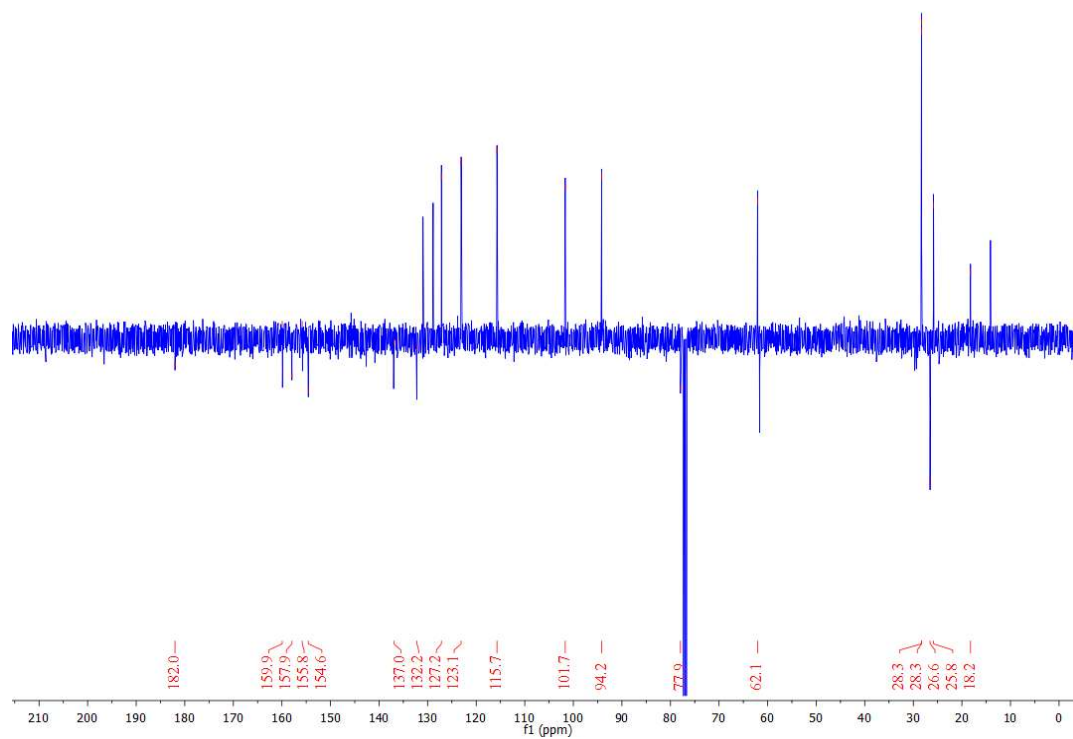

Figures S2. APT spectra of 9-hydroxycalabaxanthone (1).

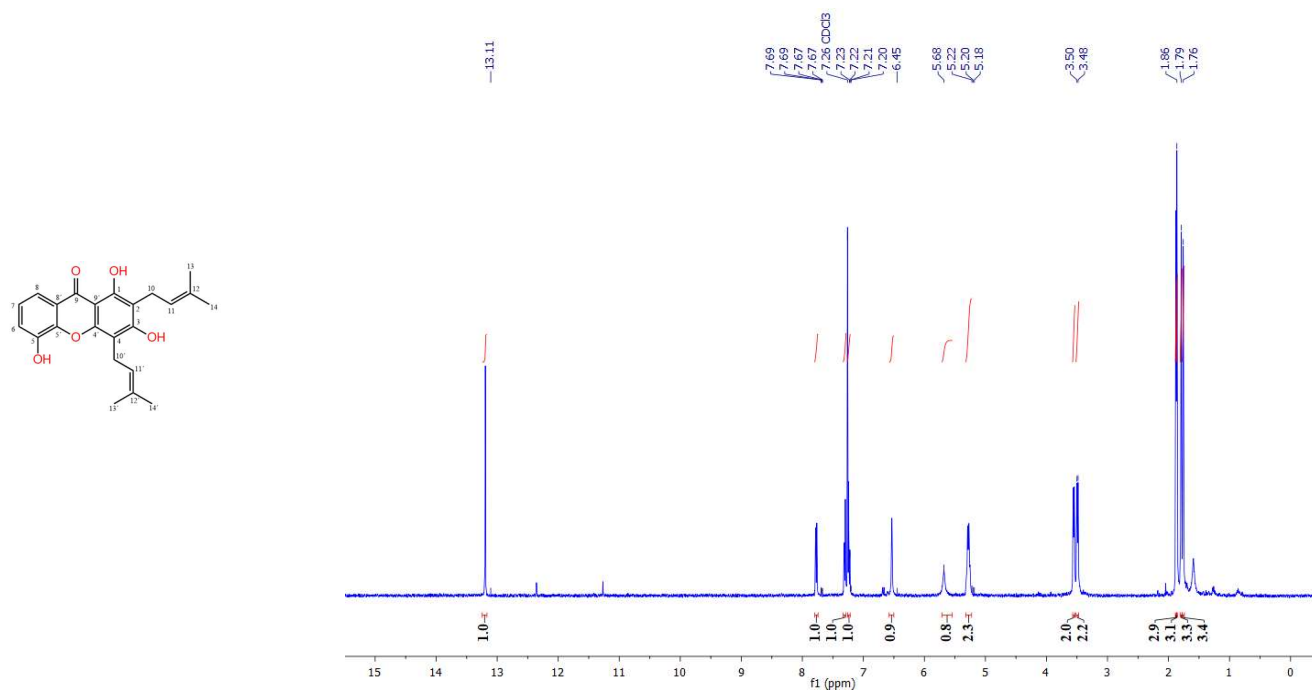

Figures S3.  $^1\text{H}$ -NMR spectra of 8-deoxygartanin (2).

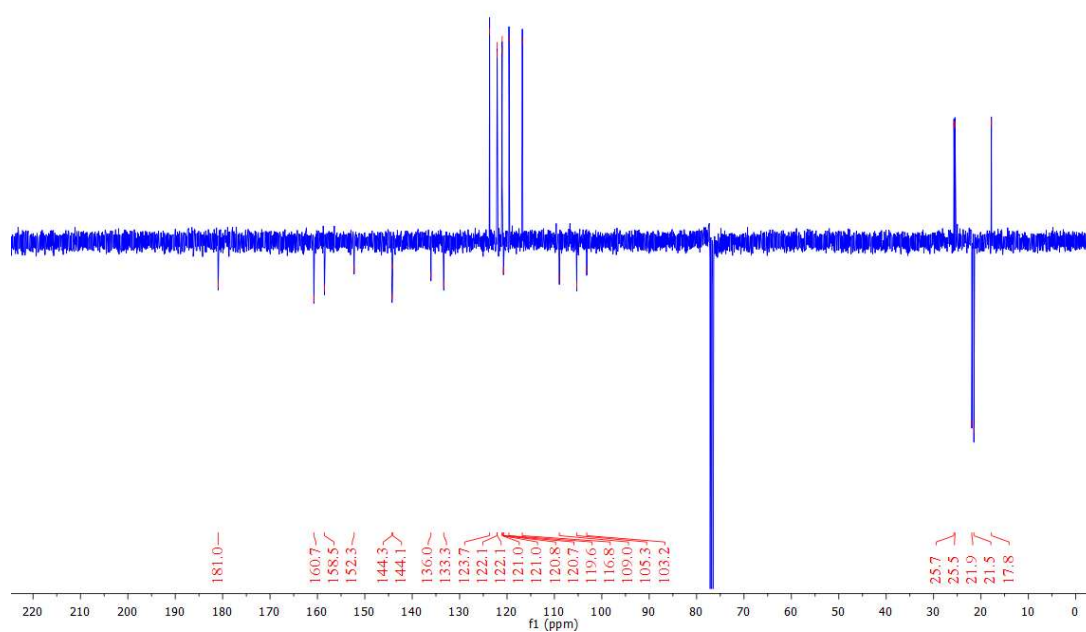

Figures S4. APT spectra of 8-deoxygartanin (2).

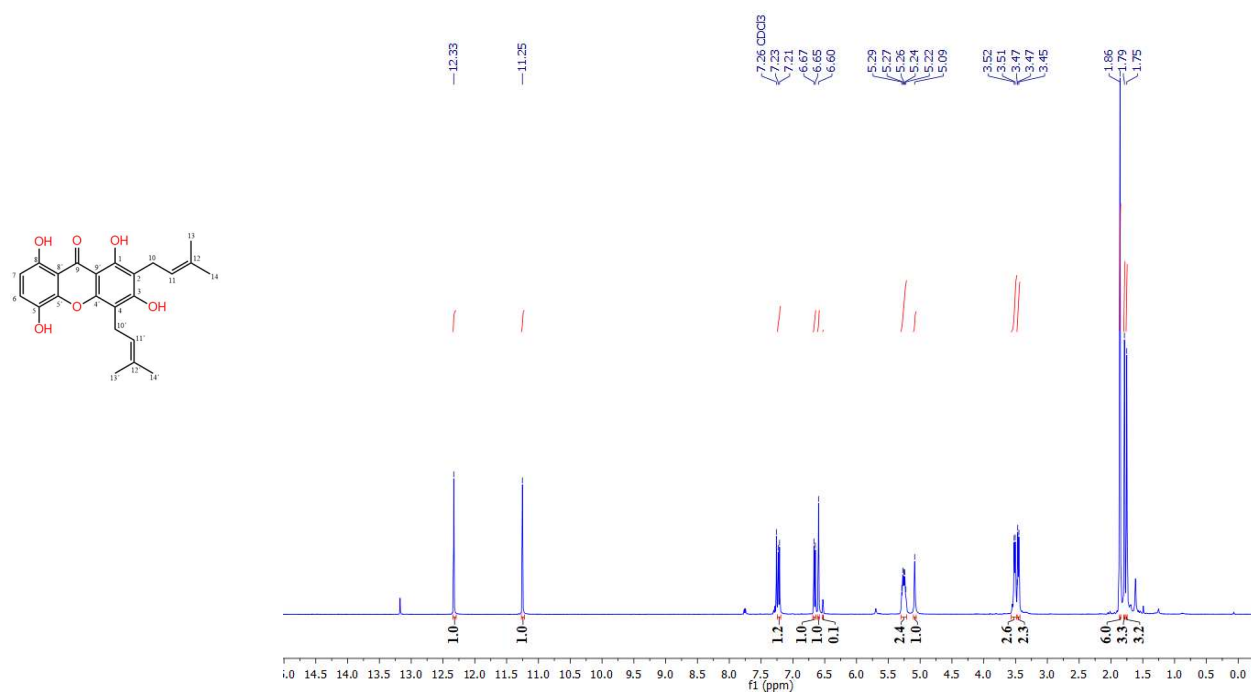

Figures S5. <sup>1</sup>H -NMR spectra of gartanin (3).

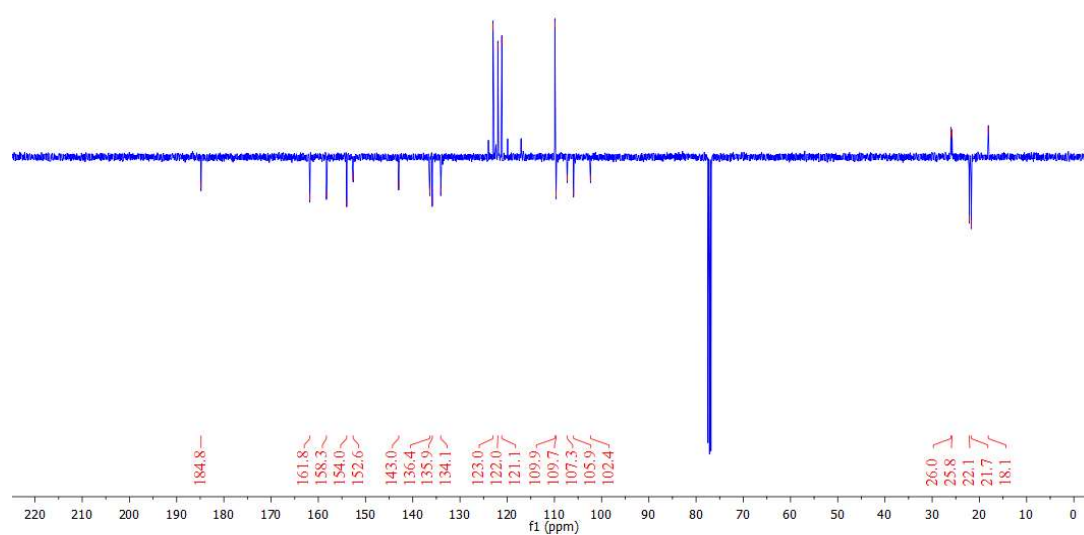

Figures S6. APT spectra of gartanin (3).

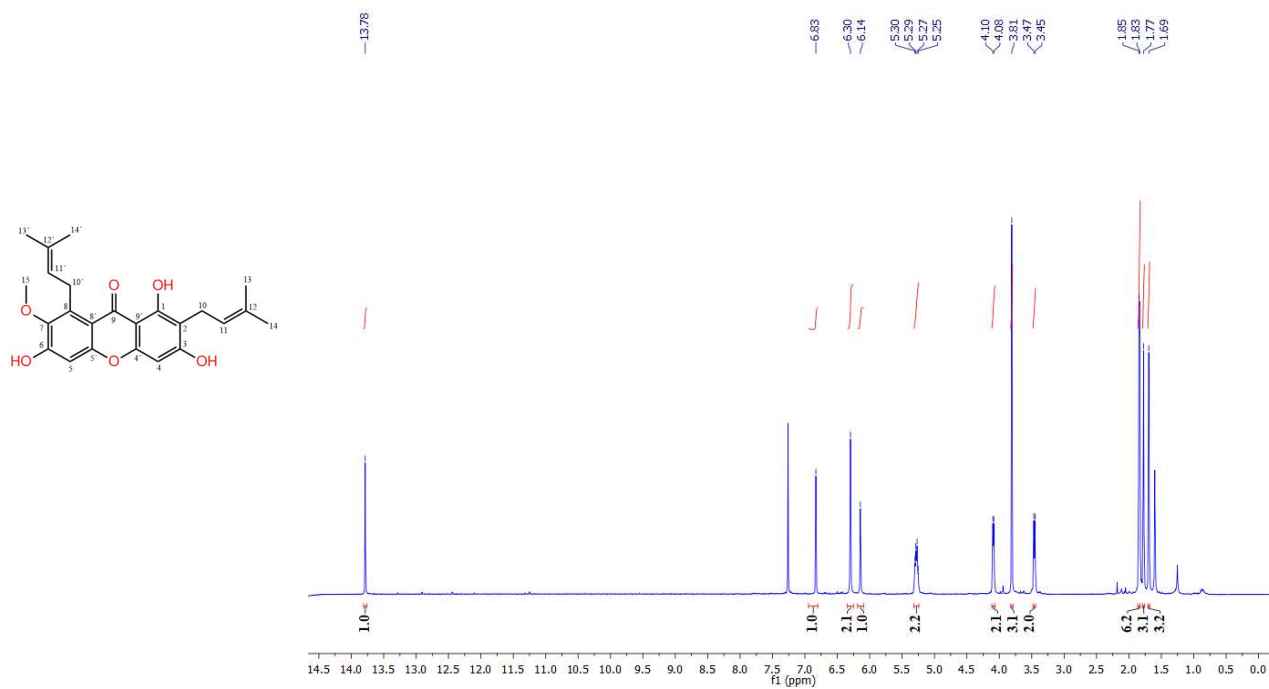

Figures S7.  $^1\text{H}$ -NMR spectra of  $\alpha$ -mangostin (4).

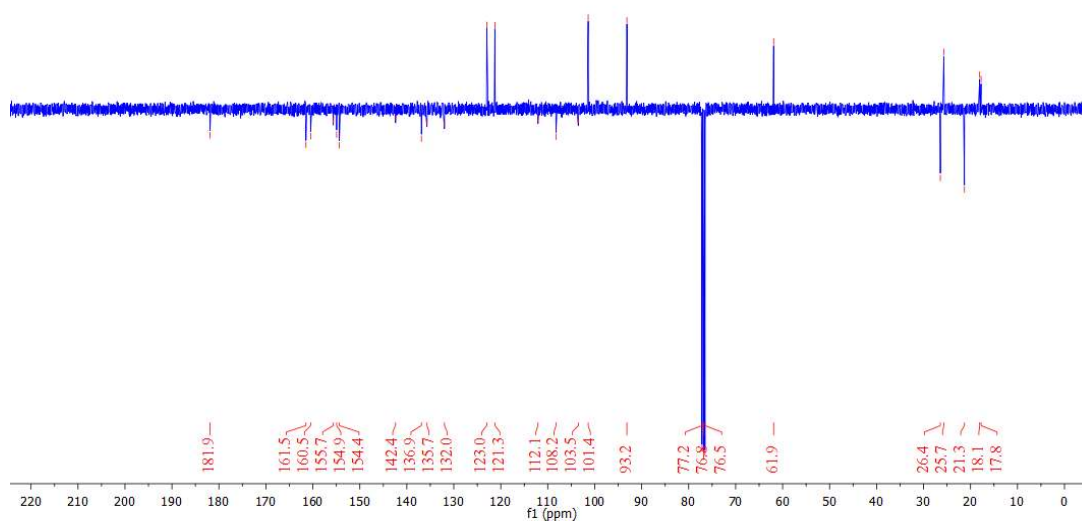

Figures S8. APT spectra of  $\alpha$ -mangostin (4).

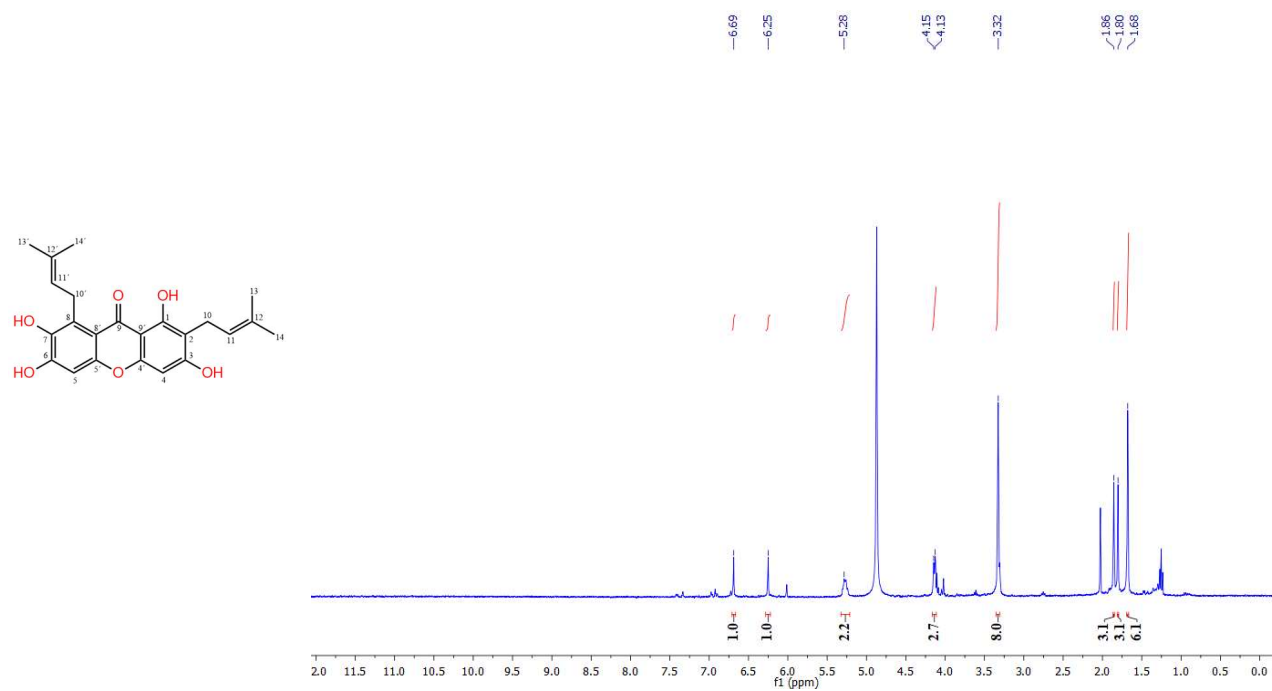

Figures S9.  $^1\text{H}$ -NMR spectra of  $\gamma$ -mangostin (5).

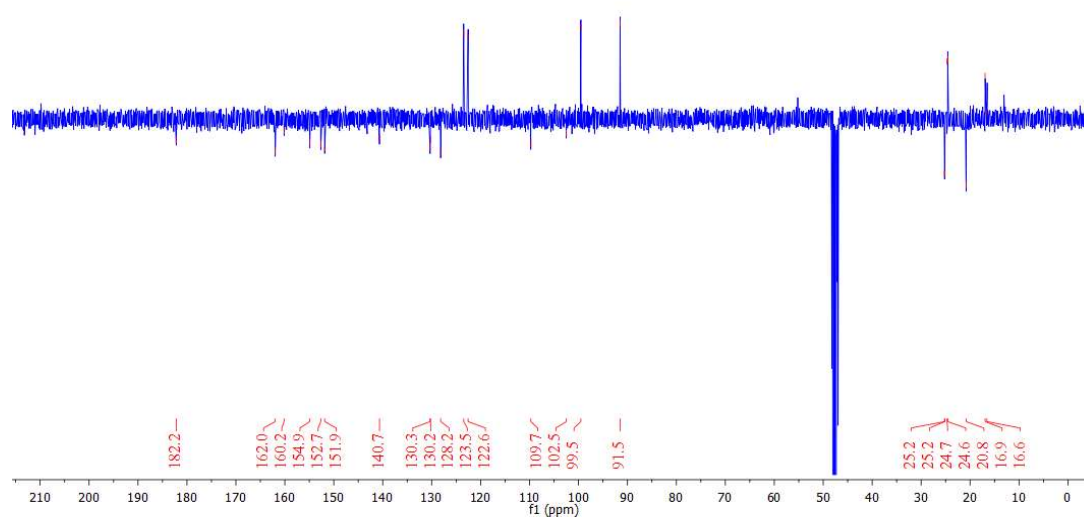

Figures S10. APT spectra of  $\gamma$ -mangostin (5).



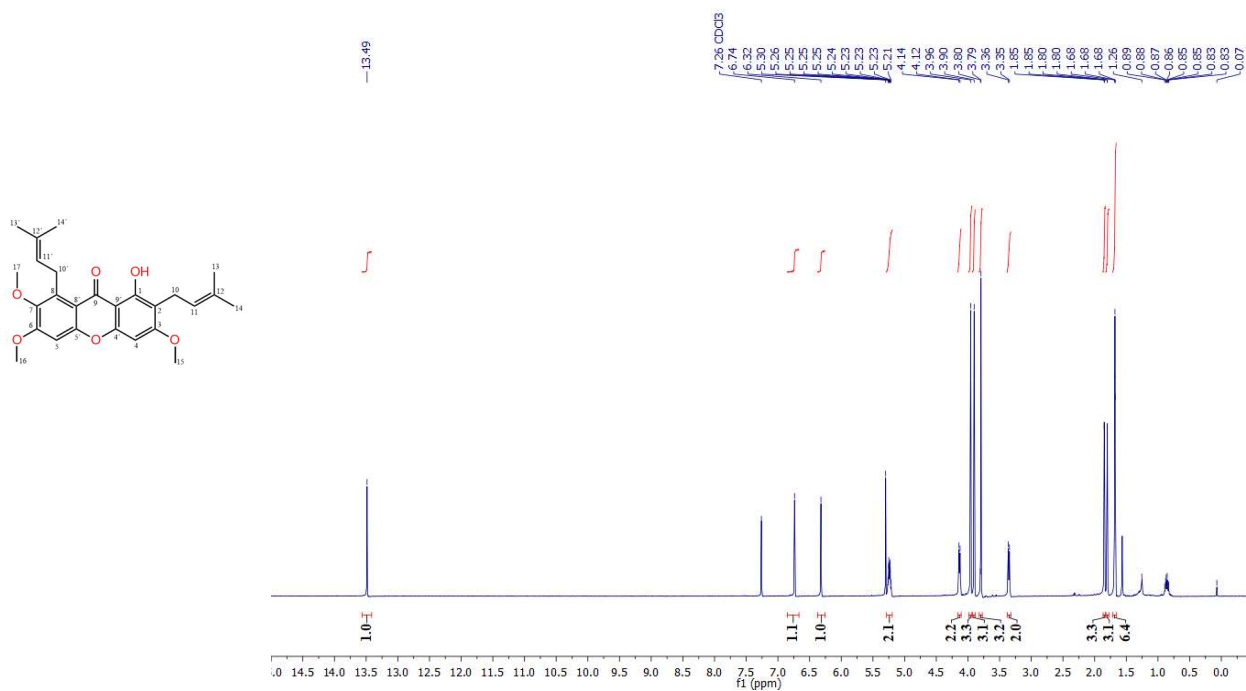

Figures S11.  $^1\text{H}$ -NMR spectra of fuscaxanthone C (6).

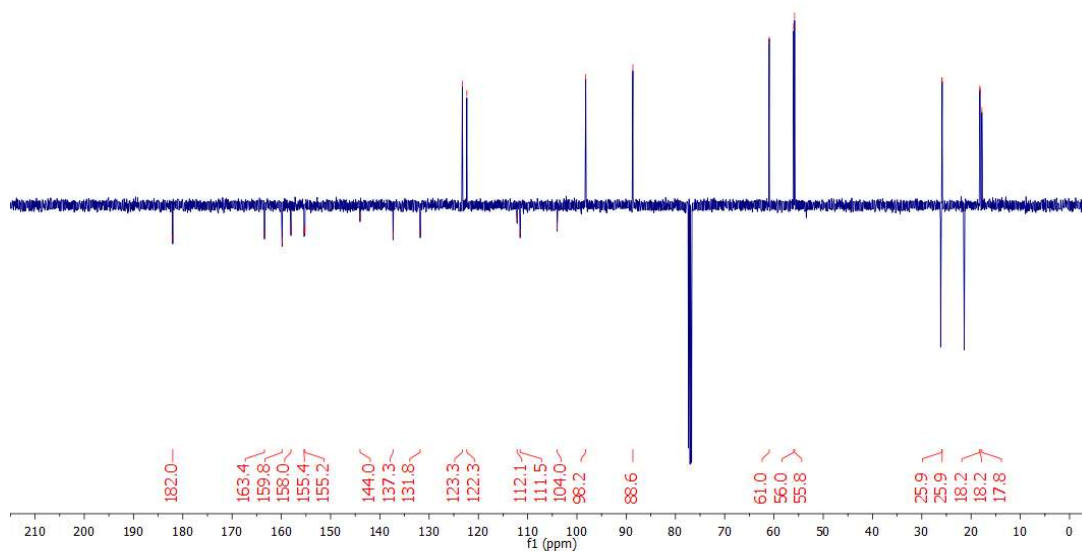

Figures S12. APT spectra of fuscaxanthone C (6).

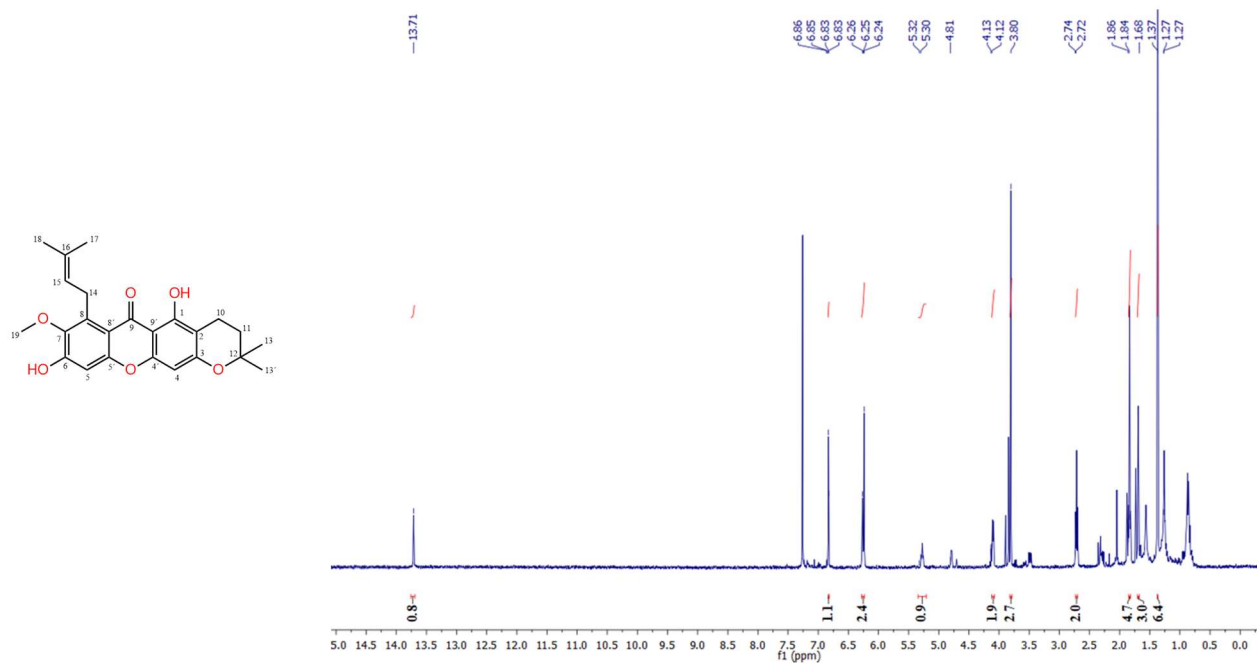

Figures S13.  $^1\text{H}$ -NMR spectra of 3-isomangostin (7).

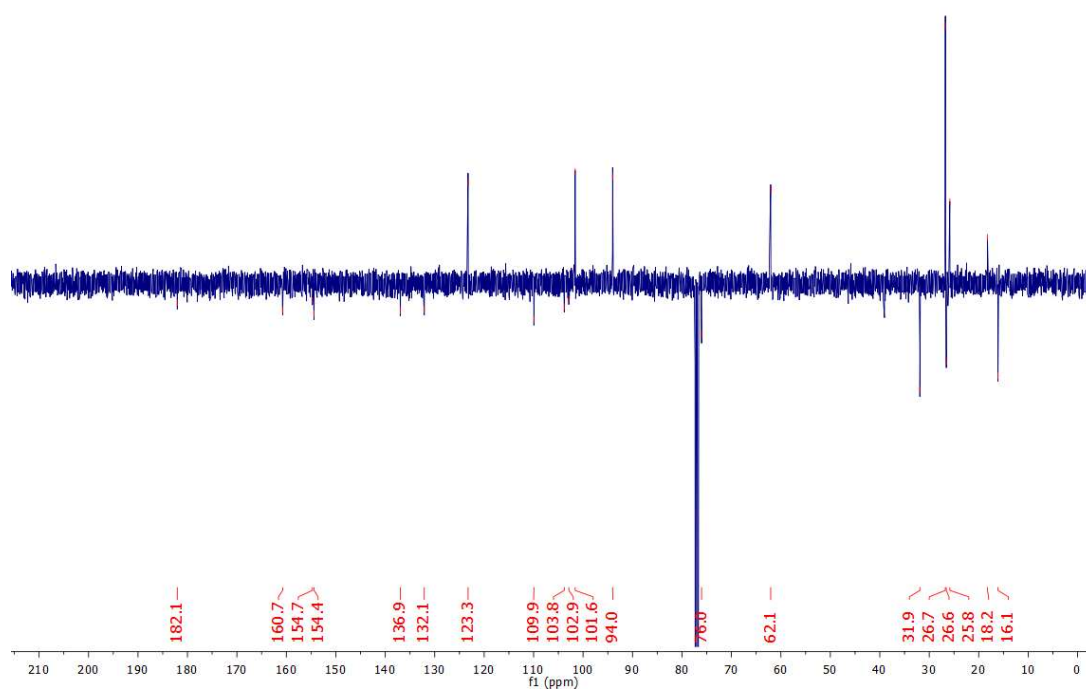

Figures S14. APT spectra of 3-isomangostin (7).

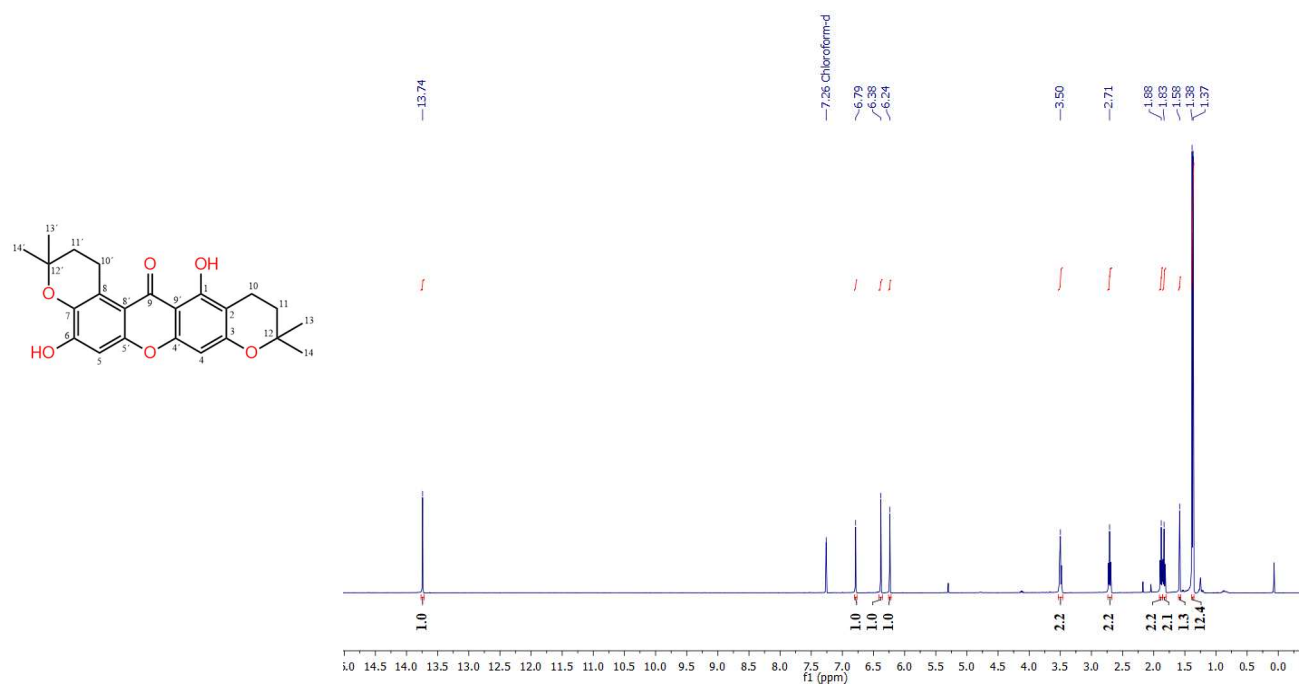

Figures S15. <sup>1</sup>H -NMR spectra of BR-xanthone-A (8).

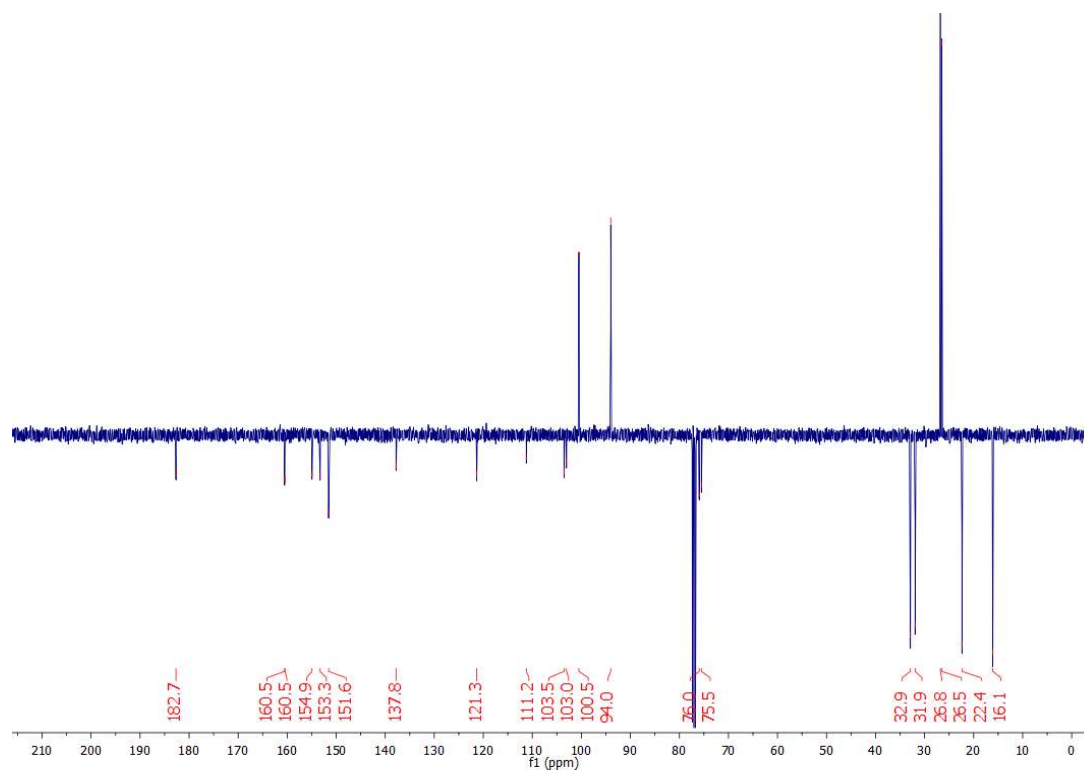

Figures S16. APT spectra of BR-xanthone-A (8).

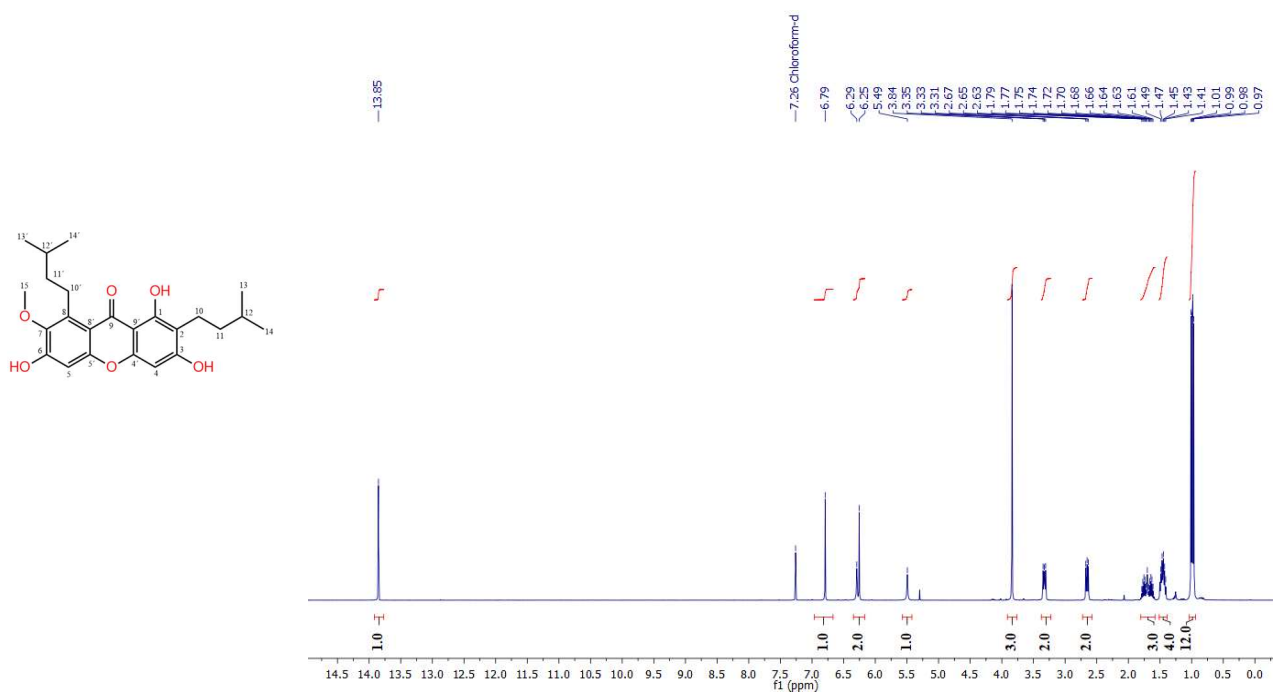

Figures S17.  $^1\text{H}$ -NMR spectra of tetrahydro- $\alpha$ -mangostin (9).

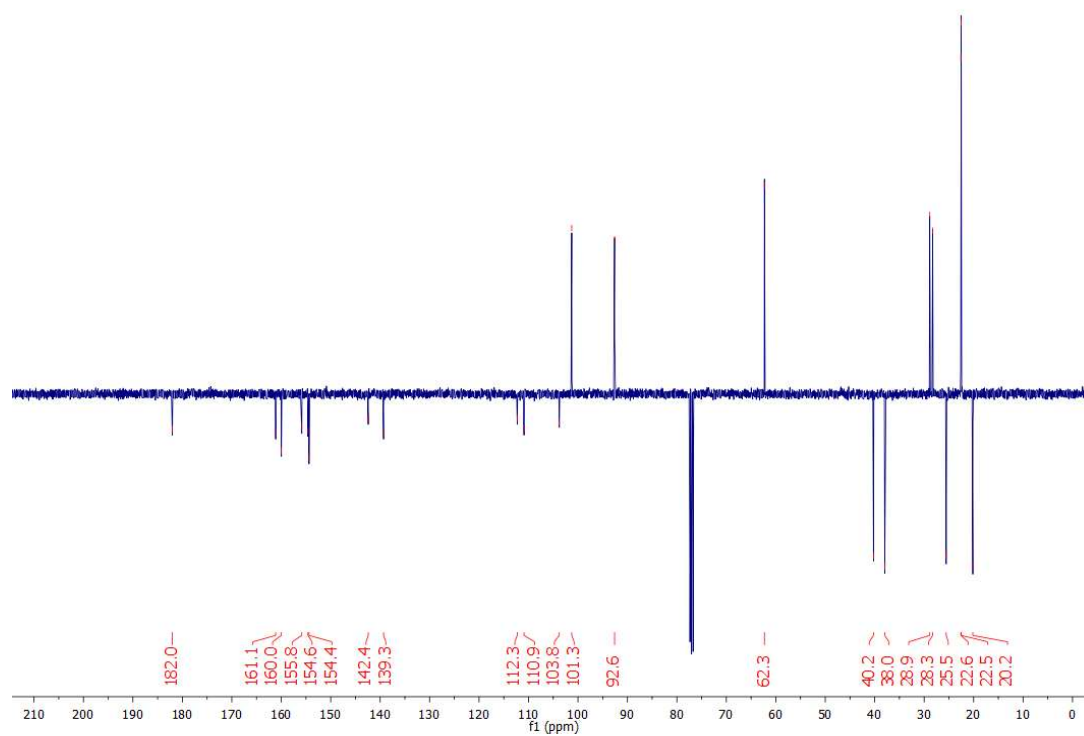

Figures S18. APT spectra of tetrahydro- $\alpha$ -mangostin (9).

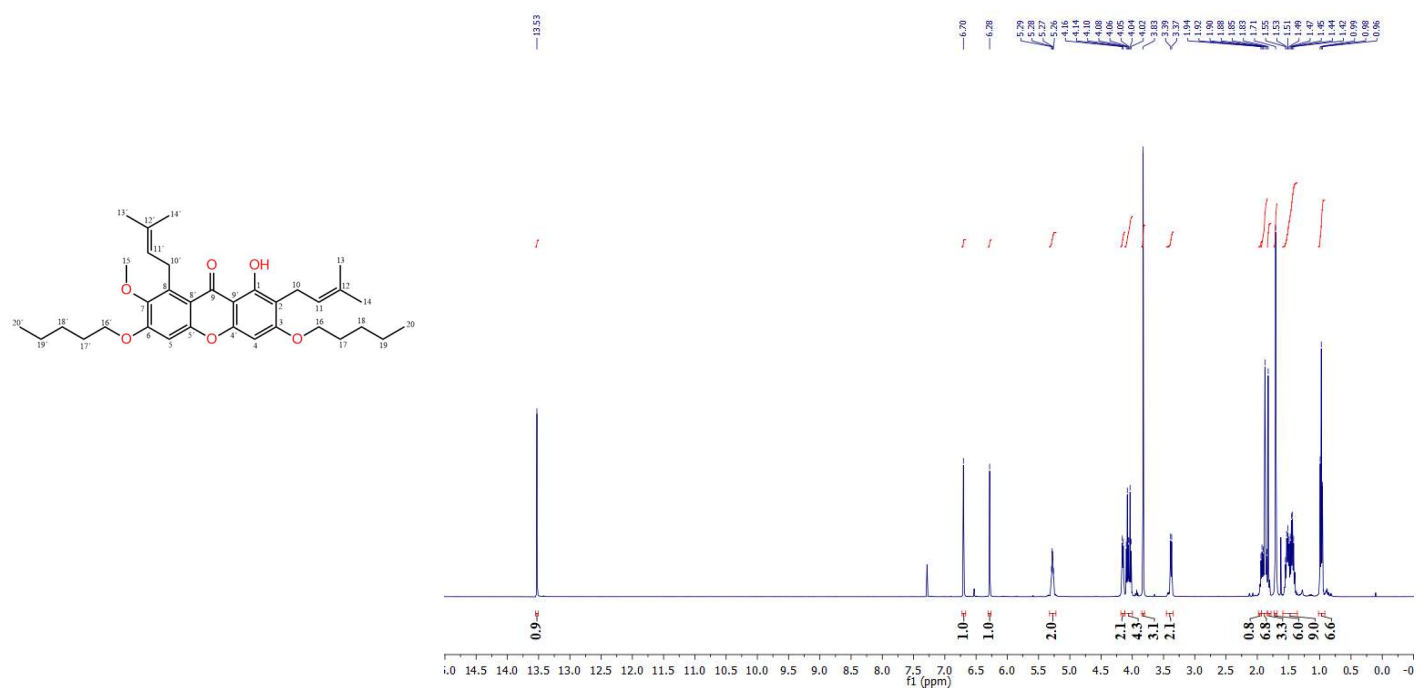

Figures S19.  $^1\text{H}$ -NMR spectra of 3,6-di-pentoxy- $\alpha$ -mangostin (10).

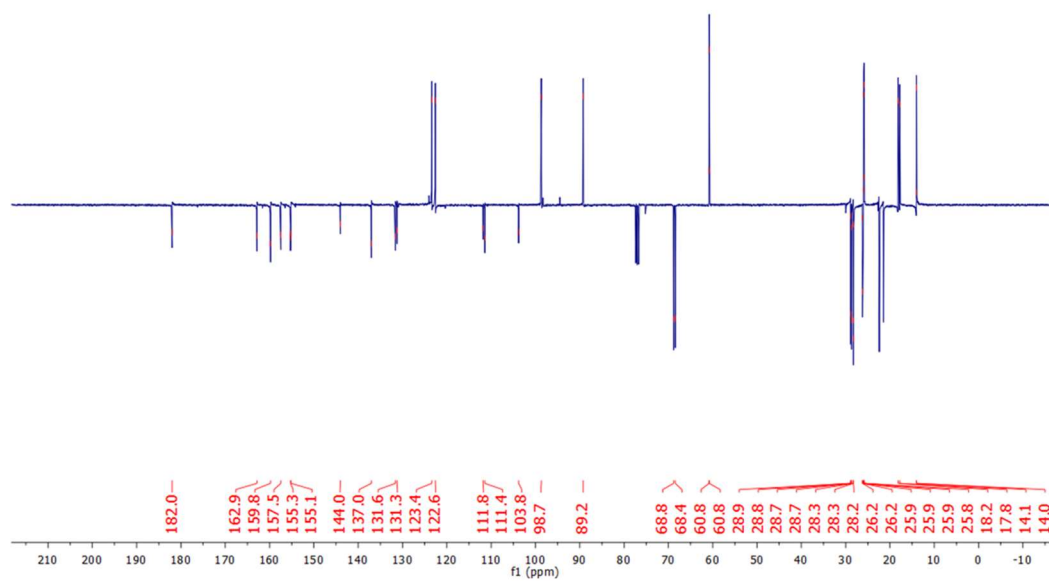

Figures S20. APT spectra of 3,6-di-pentoxy- $\alpha$ -mangostin (10).

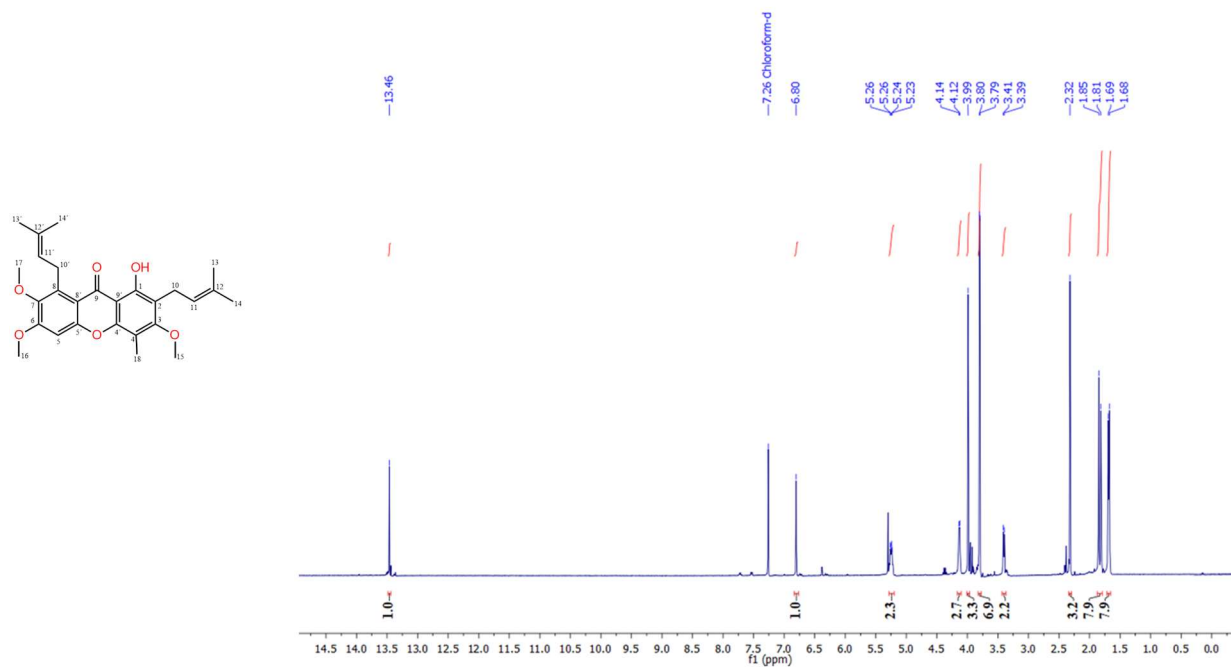

Figures S21.  $^1\text{H}$ -NMR spectra of 3,6-di-methoxy-4-methyl- $\alpha$ -mangostin (11).

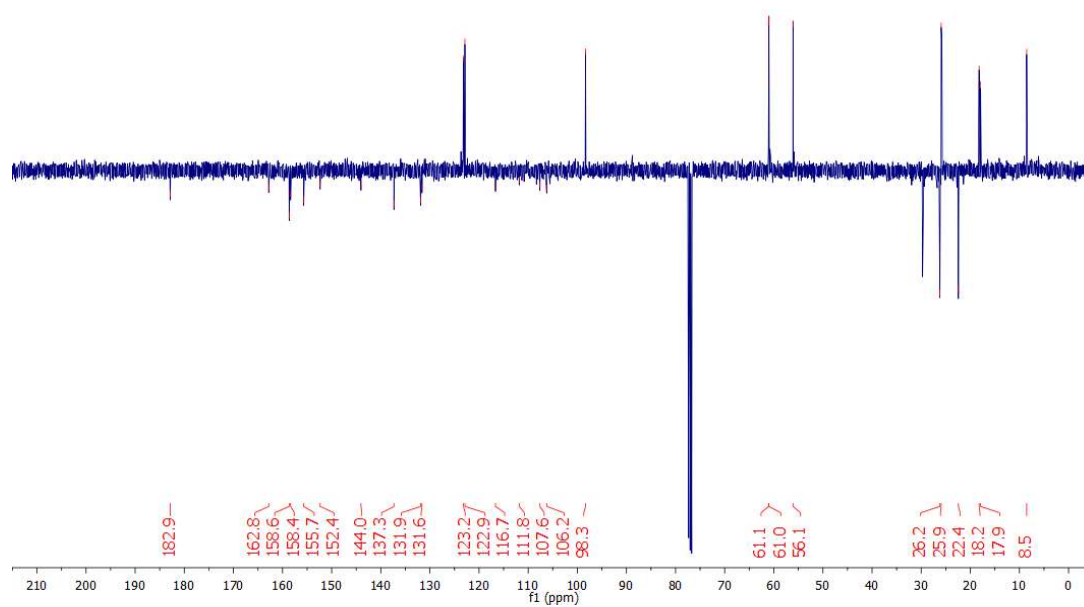

Figures S22. APT spectra of 3,6-di-methoxy-4-methyl- $\alpha$ -mangostin (11).

### 3. Molecular docking studies.

**Table S1.** Docking Scoring energies found for compounds **1** to **11** against each enzyme (PL, AA and AG)

ADV: AutoDock Vina, ADT: AutoDock 4.2, Glide: Maestro,

| Pancreatic lipase |                  |        | $\alpha$ -amilase |        |        | $\alpha$ -glucosidase |        |        |        |
|-------------------|------------------|--------|-------------------|--------|--------|-----------------------|--------|--------|--------|
| Compound          | Score (Kcal/mol) |        |                   |        |        |                       |        |        |        |
|                   | ADV              | AD4    | Glide             | ADV    | AD4    | Glide                 | ADV    | AD4    | Glide  |
| 1                 | -9,200           | -7,080 | -6,278            |        |        |                       | -8,500 | -5,560 | -3,850 |
| 2                 | -8,800           | -5,460 | -5,782            | -7,400 | -4,430 | -3,554                | -7,800 | -5,090 | -4,603 |
| 3                 | -9,400           | -4,970 | -5,789            |        |        |                       | -7,800 | -4,470 | -4,099 |
| 4                 | -8,900           | -4,740 | -7,192            | -7,500 | -5,030 | -3,117                | -8,300 | -4,280 | -3,984 |
| 5                 | -9,700           | -6,060 | -5,801            | -8,600 | -5,930 | -3,089                | -8,400 | -4,550 | -4,160 |
| 6                 | -8,900           | -4,520 | -5,993            | -8,100 | -3,790 | -3,197                | -7,500 | -4,200 | -3,745 |
| 7                 |                  |        |                   |        |        |                       | -7,700 | -5,180 | -3,756 |
| 9                 | -9,100           | -6,860 | -6,894            | -7,500 | -5,610 | -3,476                | -8,400 | -5,720 | -3,394 |
| 11                | -7,200           | -8,788 | -3,034            |        |        |                       |        |        |        |

# Pancreatic lipase

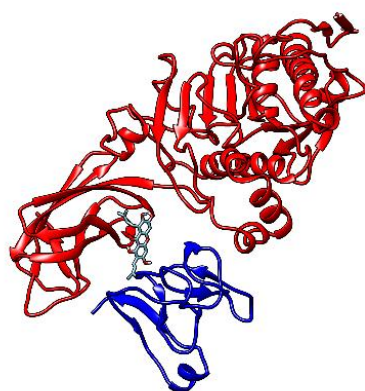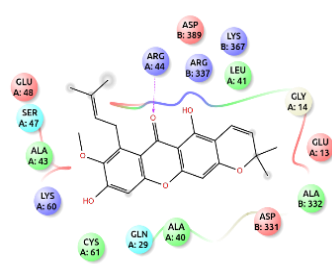

1

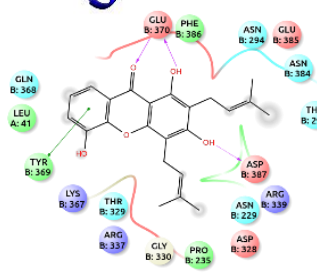

2

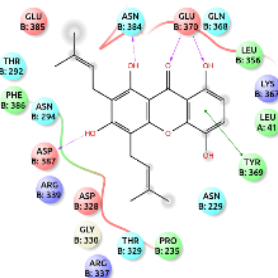

3

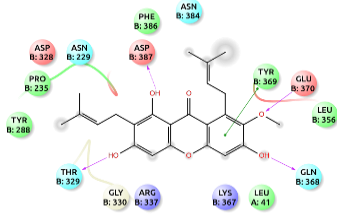

4

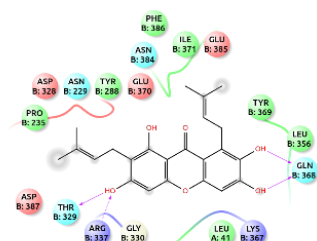

5

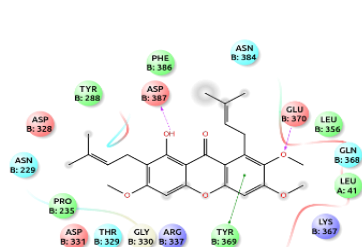

6

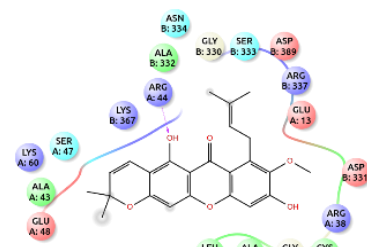

7

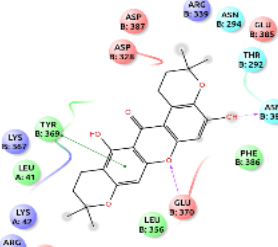

8

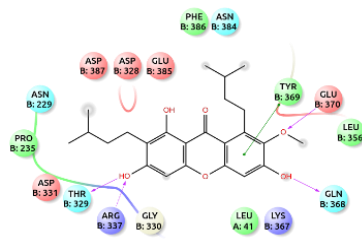

9

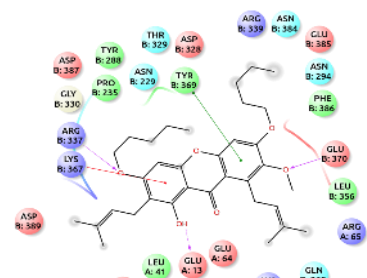

10

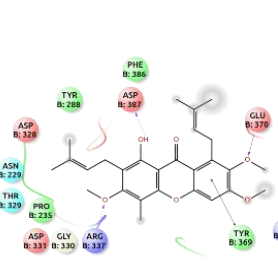

11

Figure S23. Molecular docking interaction found for compounds 1 to 11 against PL enzyme.



# $\alpha$ -amylase

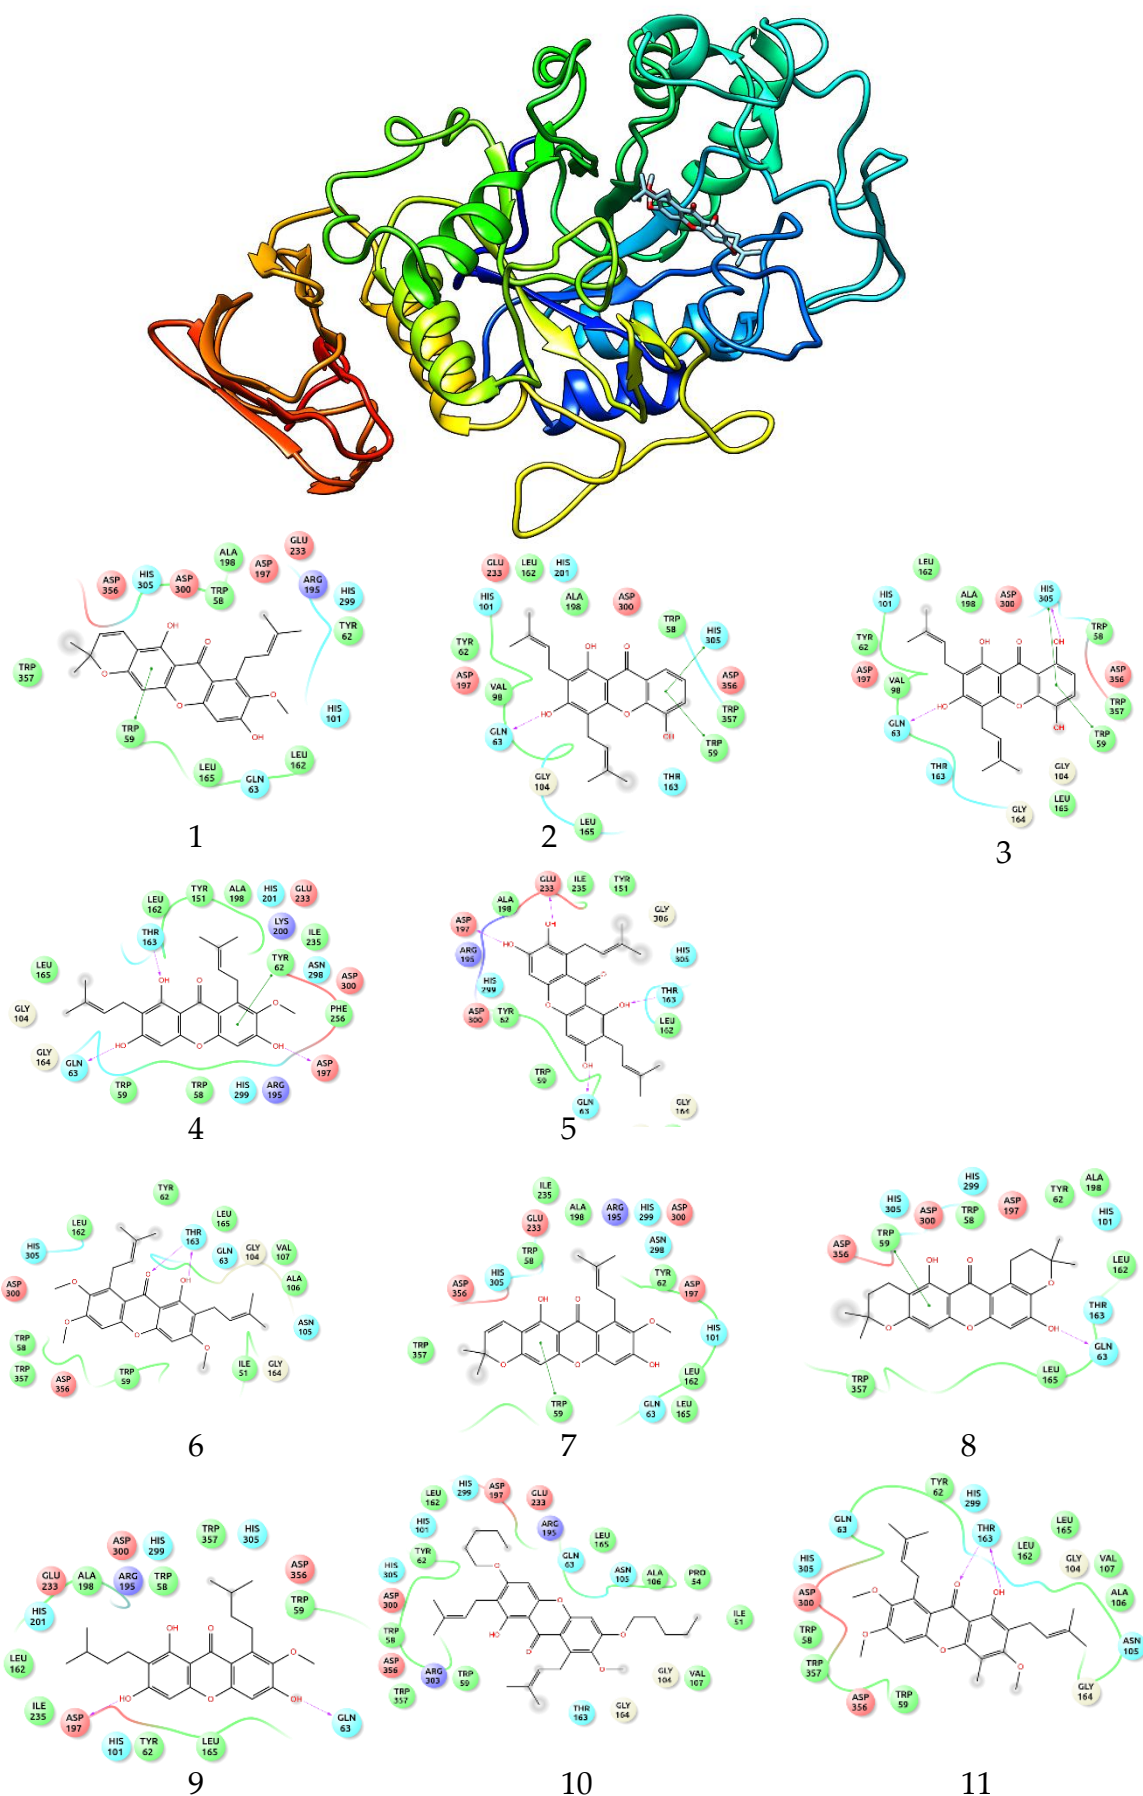

**Figure S24.** Molecular docking interaction found for compounds 1 to 11 against AA enzyme.

# $\alpha$ -glucosidase

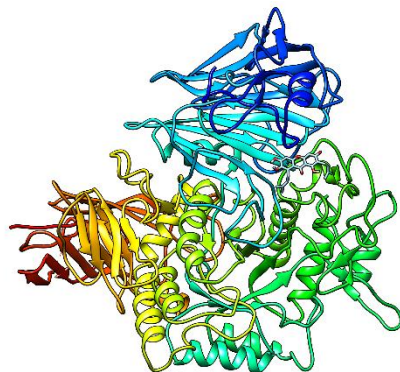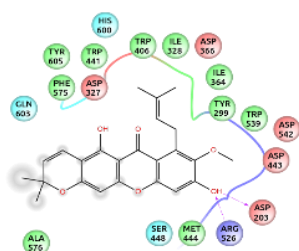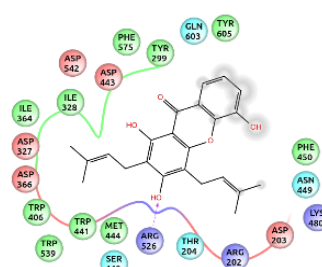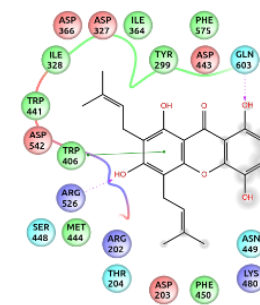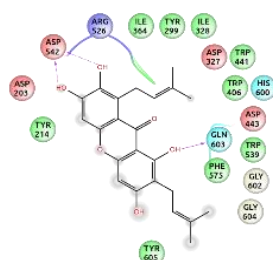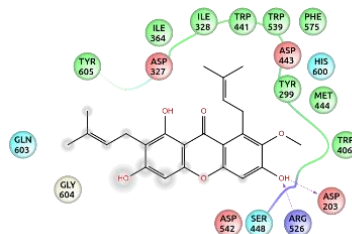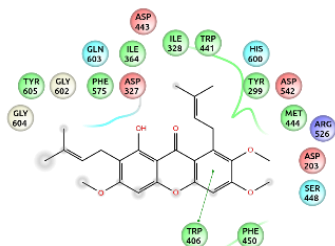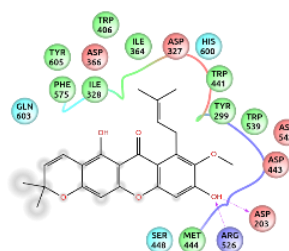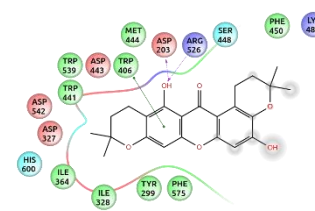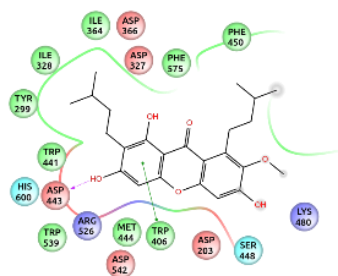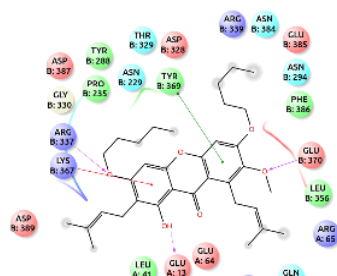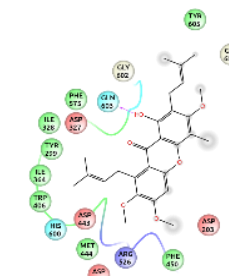

Figure S25. Molecular docking interaction found for compounds 1 to 11 against AG enzyme.

#### 4. Kinetic study

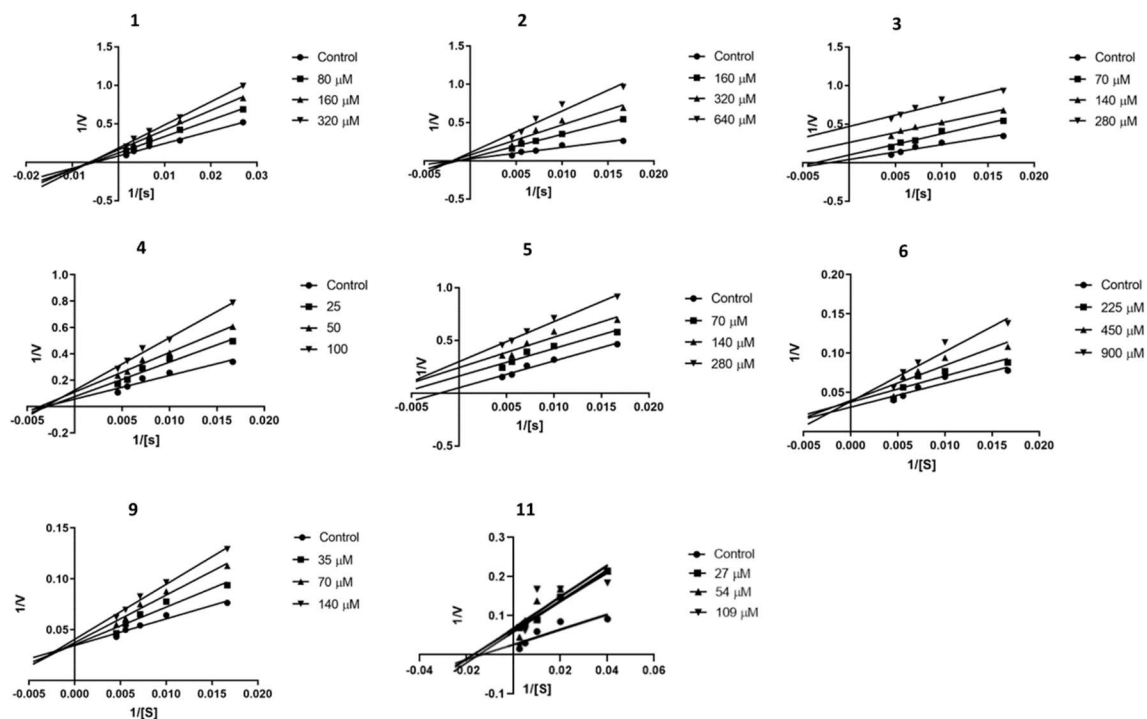

Figure S26. Kinetic found for compounds 1 to 11 against PL enzyme.

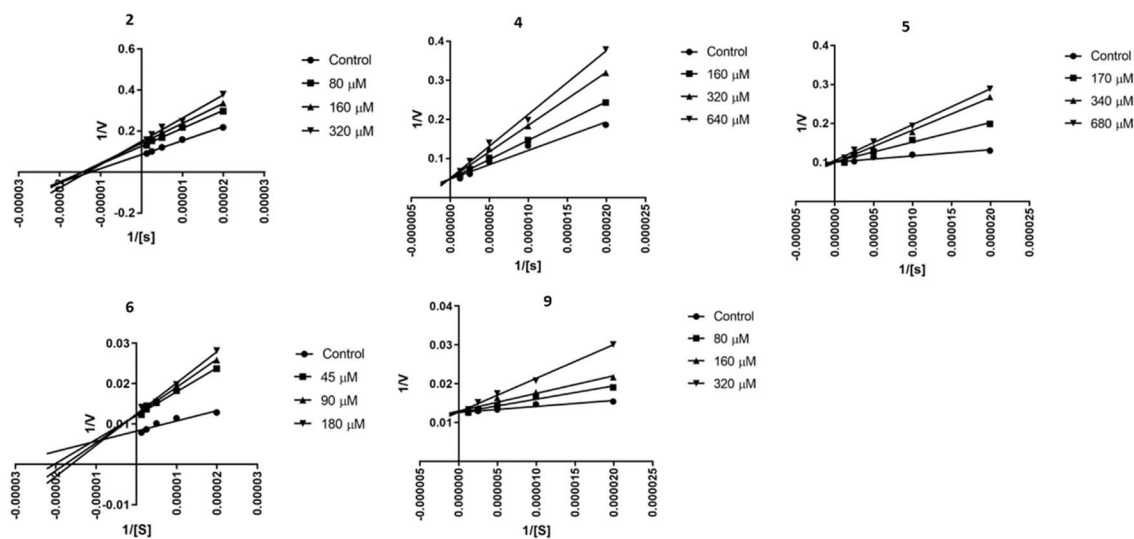

Figure S27. Kinetic found for compounds 2 to 9 against AA enzyme.

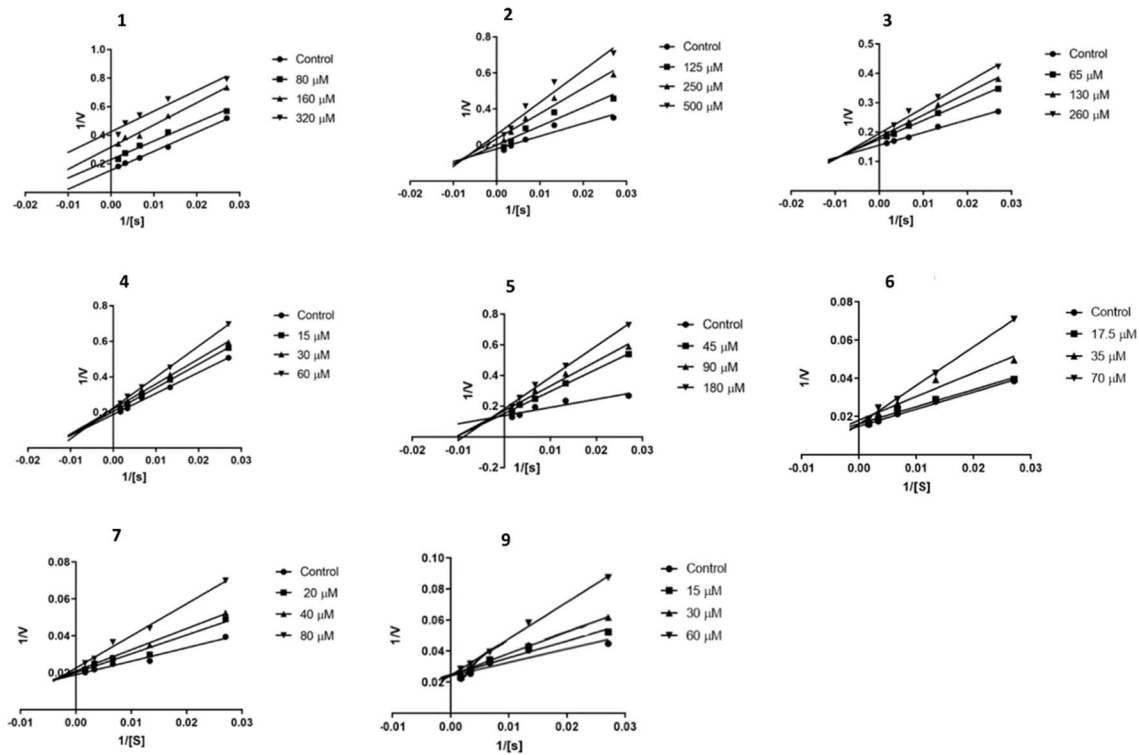

**Figure S28.** Kinetic found for compounds **1** to **9** against AG enzyme.
